# Supplementary material for: Stratification of Gene Coexpression Patterns and GO Function Mining for a RNA-Seq Data Series
Source: Biomed Res Int. 2014 May 19;2014:969768. doi: 10.1155/2014/969768 (PMC4052503; doi:10.1155/2014/969768)
Supplement: Supplementary file 1 — Figure S1: Compare of the cluster dendrogram of gene expression patterns for COGO method and direct clustering method. Figure S2: The functional relationship networks of categories and enriched GO terms of molecular function. Figure S3: The functional relationship networks of categories and enriched GO terms of cellular component. Figure S4: Comparison of clustering performance for COGO and STEM. Figure S5: Classification performance comparisons of COGO, STEM and Direct clustering method using the colon cancer dataset. Figure S6: Performance comparisons of COGO and direct clustering method using the rat pineal gland RNA-seq dataset. Figure S7: The functional similarity of GO terms of biological process branch from the category C12. Table S1: The results of co-expression patterns contain original gene expression values, Der, SE and co-expression pattern categories. Table S2: GO function analysis results of co-expression categories of interest and functional modules recognized by similarity scores. Table S3: The comparison table of GO enrichment analysis work of pairwise DE method and COGO method. [file 969768.f1.zip]

Archive with 3 entries (3 files):
- 969768.f1/Supplementary material.doc
- 969768.f1/Table S1.xls
- 969768.f1/Table S2.xls
